# Supplementary material
Source: PubMed Central journal article supplement (PMC1315367)
Supplement: plntcell_tpc.105.035840_1.pdf [file plntcell_tpc.105.035840_1.pdf]

**Supplemental Table 3.** Biochemical pathways regulated by light in both rice and Arabidopsis.

Two sample enzymes for each pathway are given, with one rice gene and one Arabidopsis gene as examples. These two genes were from a best-matched homologous pair. Light-induced gene expression changes in fold are in parenthesis after each gene name. Pathways and Arabidopsis genes in each pathway were identified following the AraCyc pathway database (Mueller et al., 2003), while rice genes were identified based on homology to Arabidopsis genes.

|                                                | Pathway                                         | Example Enzyme                                          | Arabidopsis Gene   | Rice Gene           |
|------------------------------------------------|-------------------------------------------------|---------------------------------------------------------|--------------------|---------------------|
| Biosynthesis                                   | Amino acids                                     | O-acetylserine (thiol) lyase (cysteine biosynthesis)    | At3g03630 (2.5)    | OsJRFA065652 (2.3)  |
|                                                |                                                 | Alanine aminotransferase (alanine biosynthesis)         | At1g70580 (5.0)    | OsIFCC030660 (1.9)  |
|                                                | Cell structures                                 | 4-coumarate coenzyme A ligase                           | At1g65060 (3.6)    | OsJRFA105636 (2.3)  |
|                                                |                                                 | UDP-galactose 4-epimerase                               | At4g23920 (2.0)    | OsJRFA073610 (2.9)  |
|                                                | Cofactors, Prosthetic Groups, Electron Carriers | Chlorophyll synthetase                                  | At3g51820 (5.1)    | OsJRFA068855 (4.6)  |
|                                                |                                                 | Tocopherol cyclase (vitamin E biosynthesis)             | At4g32770 (2.5)    | OsJRFA072052 (2.1)  |
|                                                | Secondary Metabolism                            | Chalcone synthase                                       | At5g13930 (16.8)   | OsIFCC022960 (3.4)  |
|                                                |                                                 | Lycopene beta cyclase (carotenoid biosynthesis)         | At3g10230 (2.0)    | OsJRFA066182 (2.7)  |
|                                                | Sugars and Polysaccharides                      | Phosphoglucomutase                                      | At1g23190 (2.2)    | OsJRFA064893 (2.1)  |
|                                                |                                                 | 1,4-alpha-glucan branching enzyme                       | At5g03650 (2.2)    | OsIFCC017437 (2.7)  |
| Utilization/ Assimilation/ Degradation         | Alcohols                                        | Glyceraldehyde-3-phosphate dehydrogenase                | At1g42970 (11.6)   | OsIFCC017765 (5.7)  |
|                                                |                                                 | Enolase (aerobic glycerol catabolism)                   | At1g74030 (1.9)    | OsJRFA069316 (2.9)  |
|                                                | Amino Acids                                     | Aminomethyltransferase (glycine degradation)            | At1g11860 (4.3)    | OsJRFA099234 (2.9)  |
|                                                |                                                 | Aspartate aminotransferase (asparagine degradation)     | At4g31990 (3.4)    | OsJRFA072426 (2.1)  |
|                                                | C1 Compounds                                    | Fructose biphosphate aldolase                           | At4g26520 (15.2)   | OsJRFA105927 (2.6)  |
|                                                |                                                 | Fructose cytosolic                                      | At1g43670 (3.7)    | OsIFCC004110 (5.3)  |
|                                                | Fatty Acids and Lipids                          | Lipase (triacylglycerol degradation)                    | At2g42690 (3.4)    | OsJRFA059088 (2.0)  |
|                                                |                                                 | Lipoxygenase                                            | At1g55020 (2.1)    | OsIFCC008021 (2.4)  |
|                                                | Inorganic nutrients                             | Nitrate reductase                                       | At1g37130 (4.9)    | OsJRFA102363 (2.1)  |
|                                                |                                                 | ATP-sulfurylase                                         | At4g14680 (3.9)    | OsJRFA105831 (2.2)  |
| Sugars and Polysaccharides                     | Galactose (galactoside and glucose catabolism)  | At5g51820 (5.7)                                         | OsJRFA068502 (2.4) |                     |
|                                                | Fructokinase                                    | At1g69200 (3.0)                                         | OsIFCC004290 (2.1) |                     |
| Generation of precursor metabolites and energy | Glycolysis                                      | Fructose biphosphate aldolase                           | At4g38970 (13.8)   | OsJRFA099387 (1.9)  |
|                                                |                                                 | Pyrophosphate-fructose-6-phosphate 1-phosphotransferase | At1g12000 (2.2)    | OsJRFA065052 (2.7)  |
|                                                | Pentose phosphate pathways                      | Ribose 5-phosphate isomerase                            | At5g44520 (2.5)    | OsJRFA060861 (3.4)  |
|                                                |                                                 | Glucose-6-phosphate Dehydrogenase                       | At5g35790 (3.1)    | OsJRFA064867 (2.4)  |
|                                                | Photosynthesis                                  | Photosystem II oxygen-evolving complex 33               | At5g66570 (3.3)    | OsIFCC001915 (3.8)  |
|                                                |                                                 | Light-harvesting chlorophyll A                          | At3g54890 (26.0)   | OsIFCC026844 (16.0) |
